# Supplementary material
Source: PubMed Central journal article supplement (PMC3100954)
Supplement: 1016955108_pnas.201016955SI.pdf [file 1016955108_pnas.201016955SI.pdf]

# Supporting Information

Konvalinka et al. 10.1073/pnas.1016955108

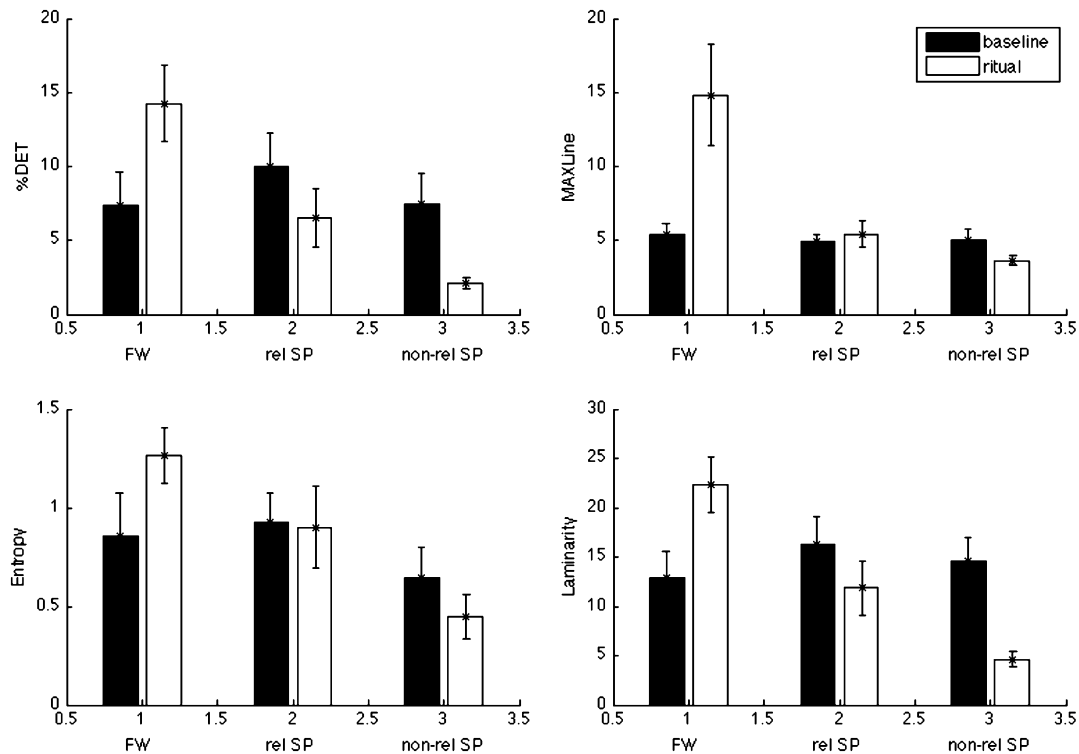

Fig. S1. Means and SEs of recurrence quantification analysis metrics (%DET, MAXLine, Entropy, and Laminarity) for the baseline (black) and ritual (white) source epochs, across three different groups of participants: 1, fire-walkers; 2, related spectators; and 3, unrelated spectators.

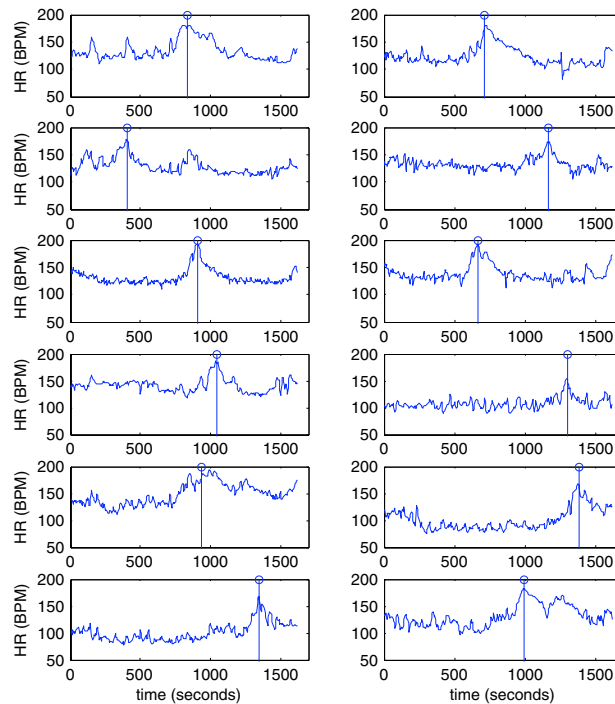

Fig. S2. Heart rates (in beats per minute) of all 12 fire-walkers during the ritual source epoch. The vertical line indicates the time at which each fire-walker crossed the fire.
